# Supplementary material
Source: publisher figshare collection journal article supplement (https://gsajournals.figshare.com/articles/dataset/_/19755412)
Supplement: Supplementary file 1 [file 2]

A

| Category 1             | All   | Intestine_only_RGS | <i>p value</i> |
|------------------------|-------|--------------------|----------------|
| Stress response        | 833   | 91                 | 1.91E-21       |
| Proteolysis proteasome | 730   | 81                 | 1.01E-19       |
| Transcription factor   | 581   | 64                 | 6.51E-16       |
| TM transport           | 901   | 69                 | 2.63E-10       |
| Metabolism             | 1601  | 81                 | 3.59E-10       |
| Unassigned             | 6343  | 303                | 6.30E-05       |
| Total genes            | 31389 | 964                |                |

B

| Category 1             | Assigned only` | Intestine_only_RGS | <i>p value</i> |
|------------------------|----------------|--------------------|----------------|
| Stress response        | 833            | 91                 | 1.06E-15       |
| Proteolysis proteasome | 730            | 81                 | 1.50E-14       |
| Transcription factor   | 581            | 64                 | 8.26E-12       |
| TM transport           | 901            | 69                 | 8.90E-07       |
| Metabolism             | 1601           | 81                 | 0.017721       |
| Total genes            | 25046          | 661                |                |

C

| Category 1        | All   | Neurons_only_RGS | <i>p value</i> |
|-------------------|-------|------------------|----------------|
| Neuronal function | 308   | 149              | 2.28E-111      |
| Cilia             | 60    | 25               | 1.85E-19       |
| Globin            | 36    | 19               | 1.21E-16       |
| TM protein        | 3200  | 176              | 3.13E-15       |
| TM transport      | 901   | 74               | 5.79E-15       |
| Signaling         | 1188  | 84               | 2.14E-13       |
| Unassigned        | 6343  | 198              | 0.035747       |
| Total genes       | 31389 | 833              |                |

D

| Category 1        | Assigned only` | Neurons_only_RGS | <i>p value</i> |
|-------------------|----------------|------------------|----------------|
| Neuronal function | 308            | 149              | 3.05E-98       |
| Cilia             | 60             | 25               | 3.00E-17       |
| Globin            | 36             | 19               | 6.18E-15       |
| TM protein        | 3200           | 176              | 1.35E-10       |
| TM transport      | 901            | 74               | 6.21E-09       |
| Signaling         | 1188           | 84               | 2.48E-08       |
| Total genes       | 25046          | 635              |                |
