# Supplementary material
Source: publisher figshare collection journal article supplement (https://gsajournals.figshare.com/articles/dataset/_/19755412)
Supplement: Supplementary file 2 [file 2]

A

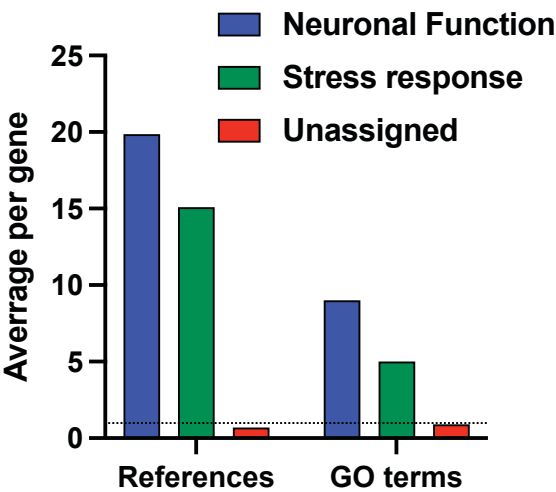

B

|                  | Neur. Fn | Stress Resp | Unassign. | Neur. Fn | Stress Resp | Unassign. |
|------------------|----------|-------------|-----------|----------|-------------|-----------|
| Number of values | 310      | 833         | 6343      | 309      | 833         | 6342      |
| Mean             | 19.87    | 10.67       | 2.46      | 9.5      | 5           | 0.86      |
| Median           | 8.5      | 2           | 2         | 7        | 3           | 0         |
| Range            | 150      | 1152        | 138       | 34       | 69          | 40        |
| 90% Percentile   | 56.9     | 11          | 3         | 22       | 12          | 3         |

C

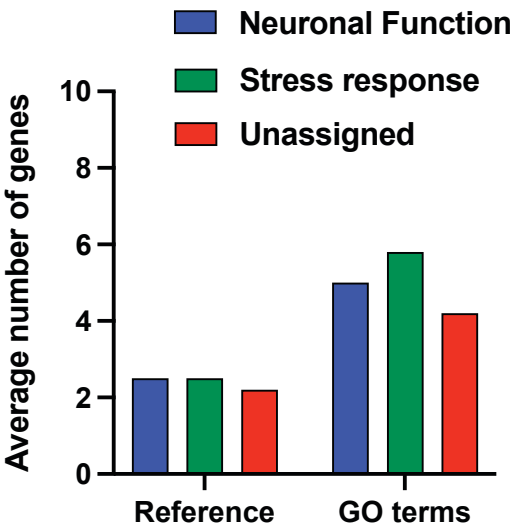

D

|                  | References |             |           | GO terms |             |           |
|------------------|------------|-------------|-----------|----------|-------------|-----------|
|                  | Neur. Fn   | Stress Resp | Unassign. | Neur. Fn | Stress Resp | Unassign. |
| Number of values | 2492       | 3358        | 959       | 194      | 713         | 1290      |
| Mean             | 2.479      | 2.468       | 2.22      | 8.5      | 5.8         | 4.2       |
| Median           | 1          | 1           | 1         | 3        | 1           | 1         |
| Range            | 151        | 395         | 598       | 133      | 233         | 512       |
| 90% Percentile   | 5          | 5           | 2         | 18       | 8           | 6         |
