# Supplementary material
Source: publisher figshare collection journal article supplement (https://gsajournals.figshare.com/articles/dataset/_/19755412)

# A

## Lineage specificity

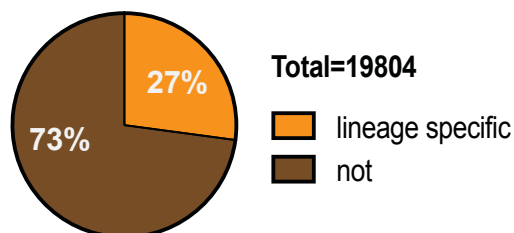

# D

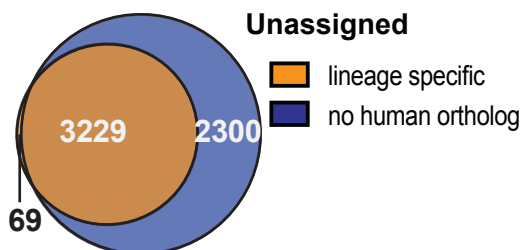

# J

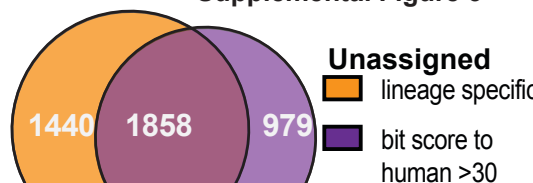

# B

## Cat1

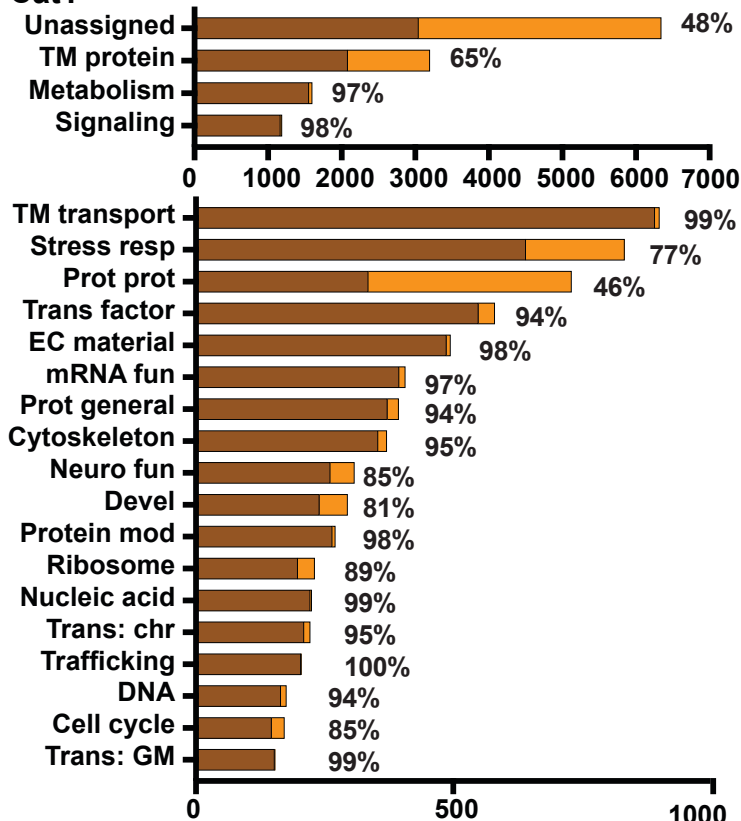

# C

## Cat1: Unassigned

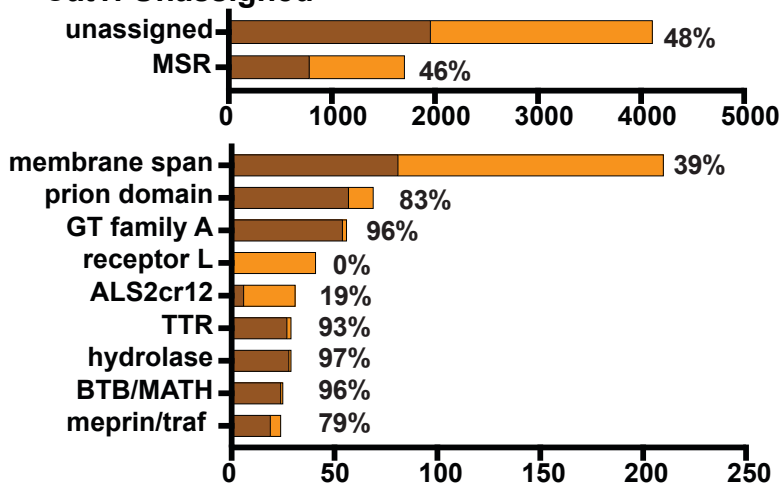

# E

## Cat1: Neuronal Function

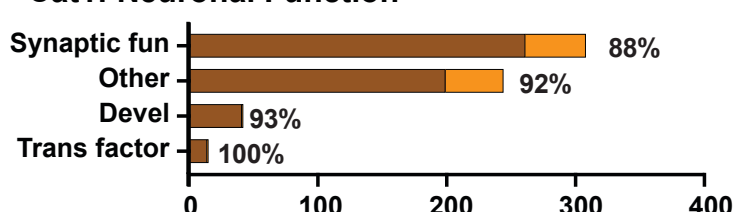

# F

## Cat3: Synaptic Function

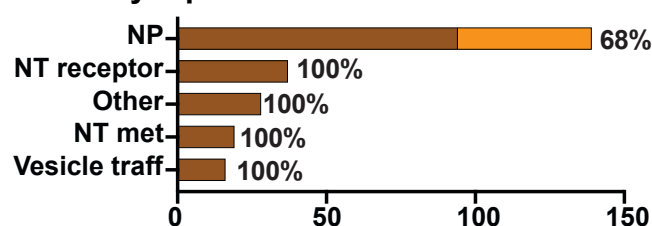

# G

## Cat1: TM protein/Signaling

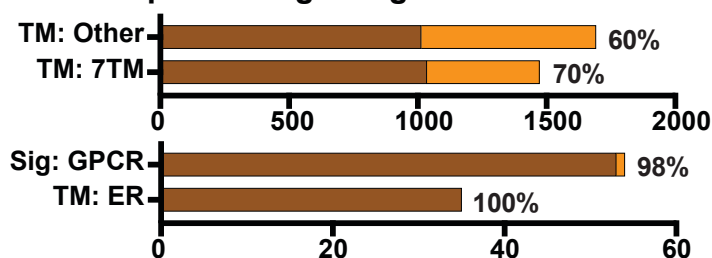

# H

## Cat1: Stress Response

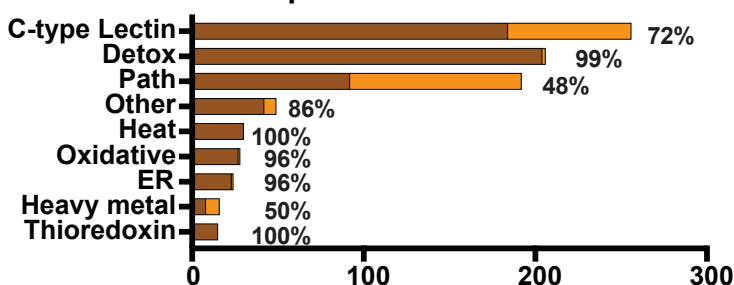

# I

## Cat2: Stress Response; Pathogen/Detoxification

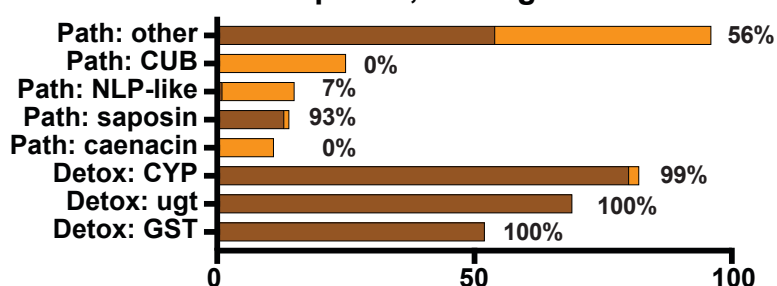

Supplement: Supplementary file 3 [file 2]
