# Supplementary material
Source: publisher figshare collection journal article supplement (https://gsajournals.figshare.com/articles/dataset/_/19755412)

A

Reinke et al.

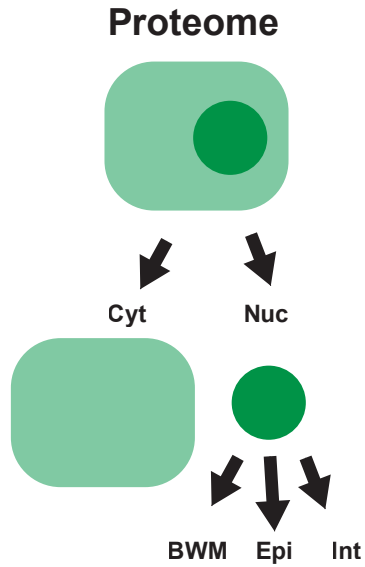

B

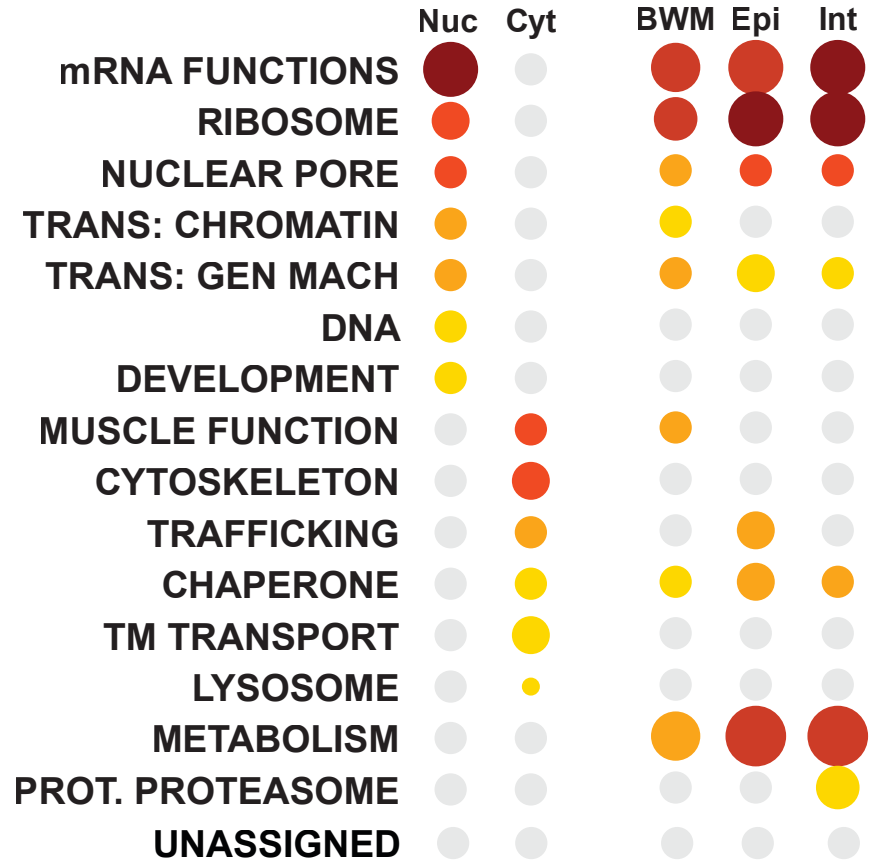

C

Narayan, et al.

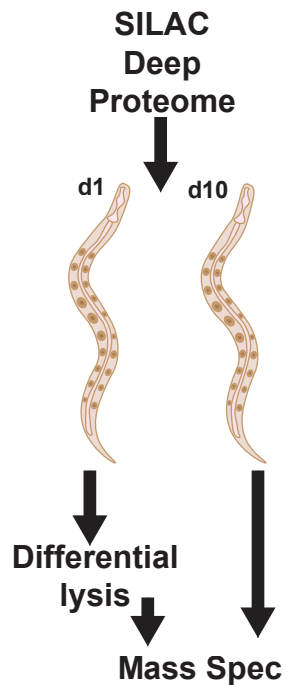

D

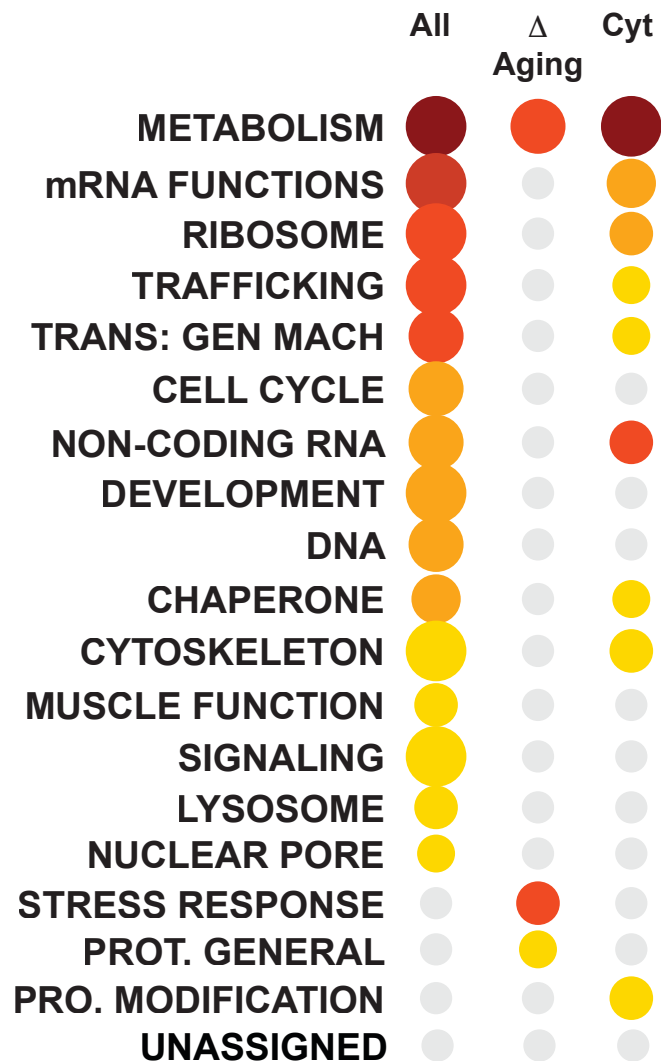

Supplement: Supplementary file 4 [file 2]

A

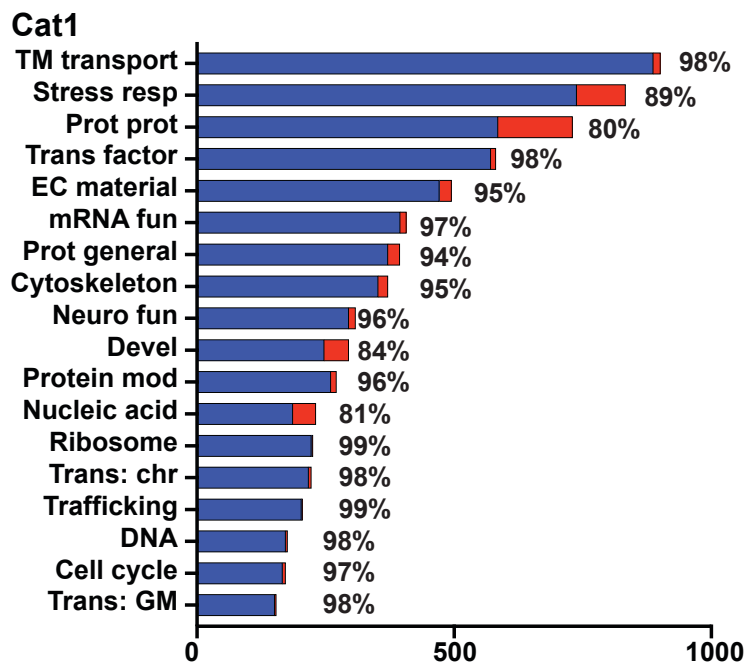

B

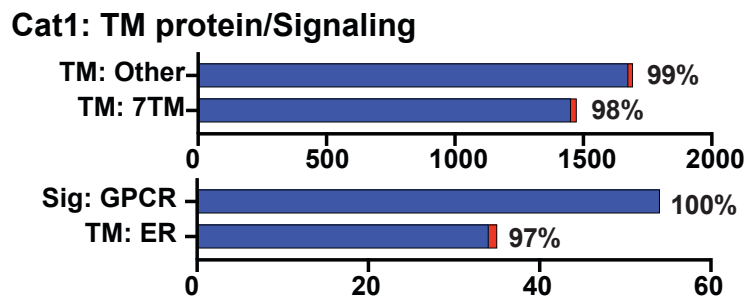

C

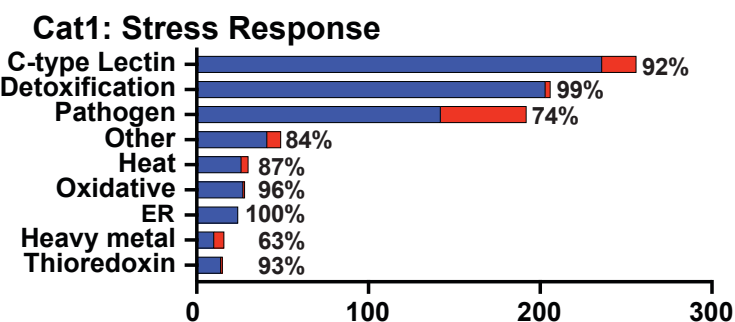

D

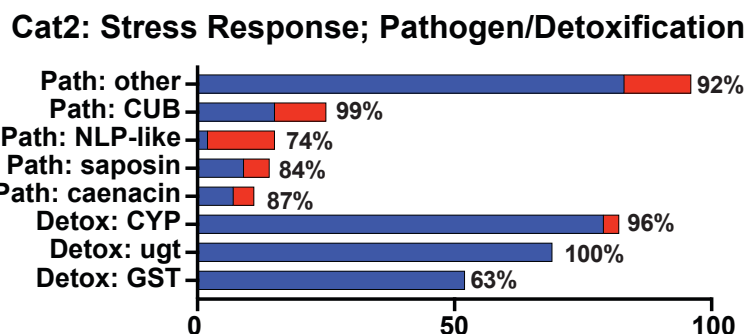

■ Lacks GO term  
■ GO term

E

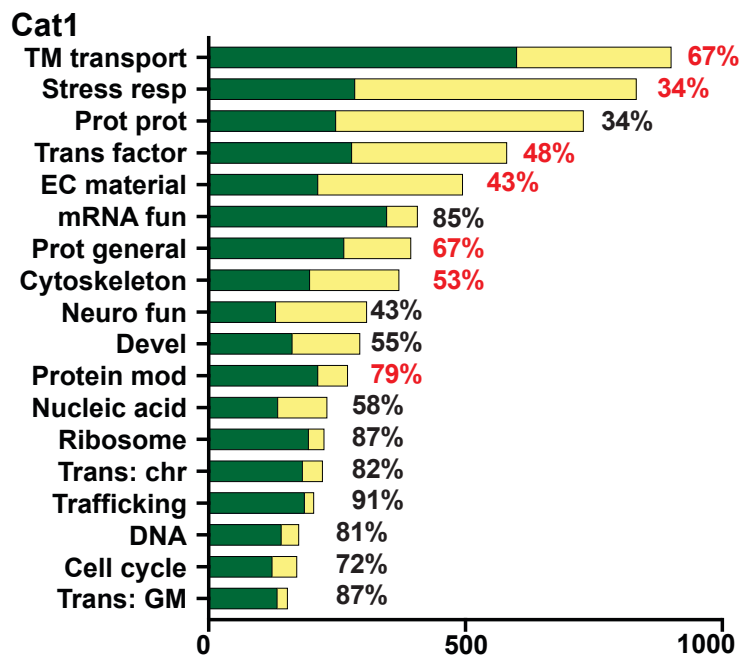

F

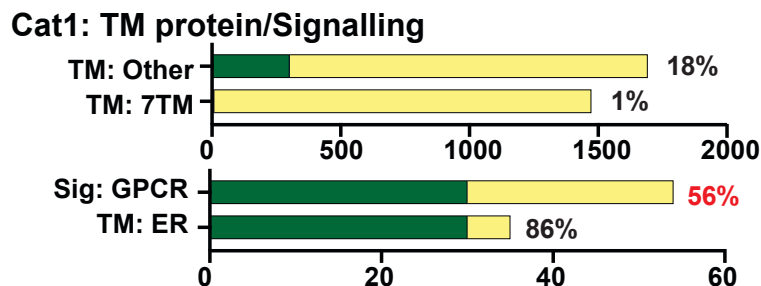

G

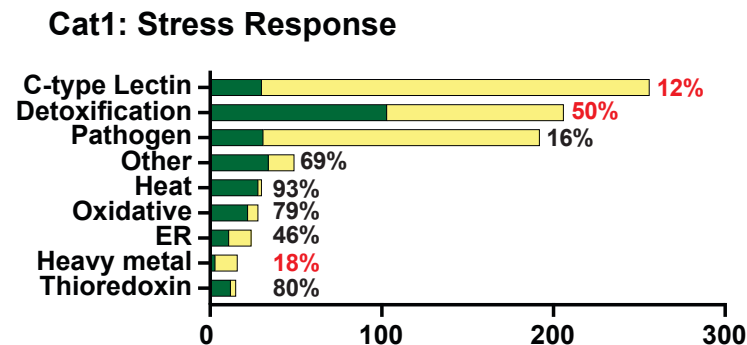

H

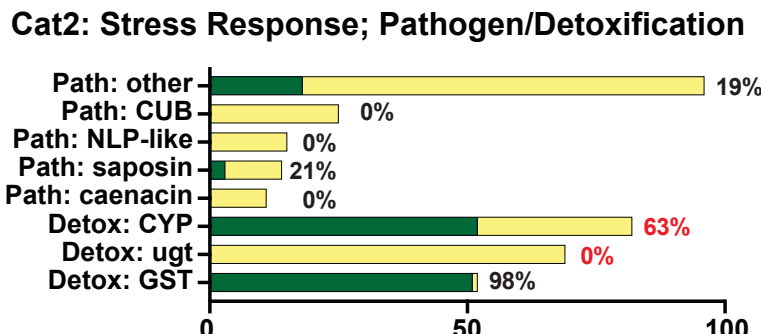

■ no ortholog  
■ ortholog

Supplement: Supplementary file 5 [file 2]
